# Supplementary material for: High pulse pressure is a risk factor for prodromal Alzheimer’s disease: a longitudinal study
Source: Aging (Albany NY). 2020 Sep 22;12(18):18221–37. doi: 10.18632/aging.103678 (PMC7585106; doi:10.18632/aging.103678)
Supplement: Supplementary Figure 1 [file aging-12-103678-s001..pdf]

SUPPLEMENTARY FIGURE

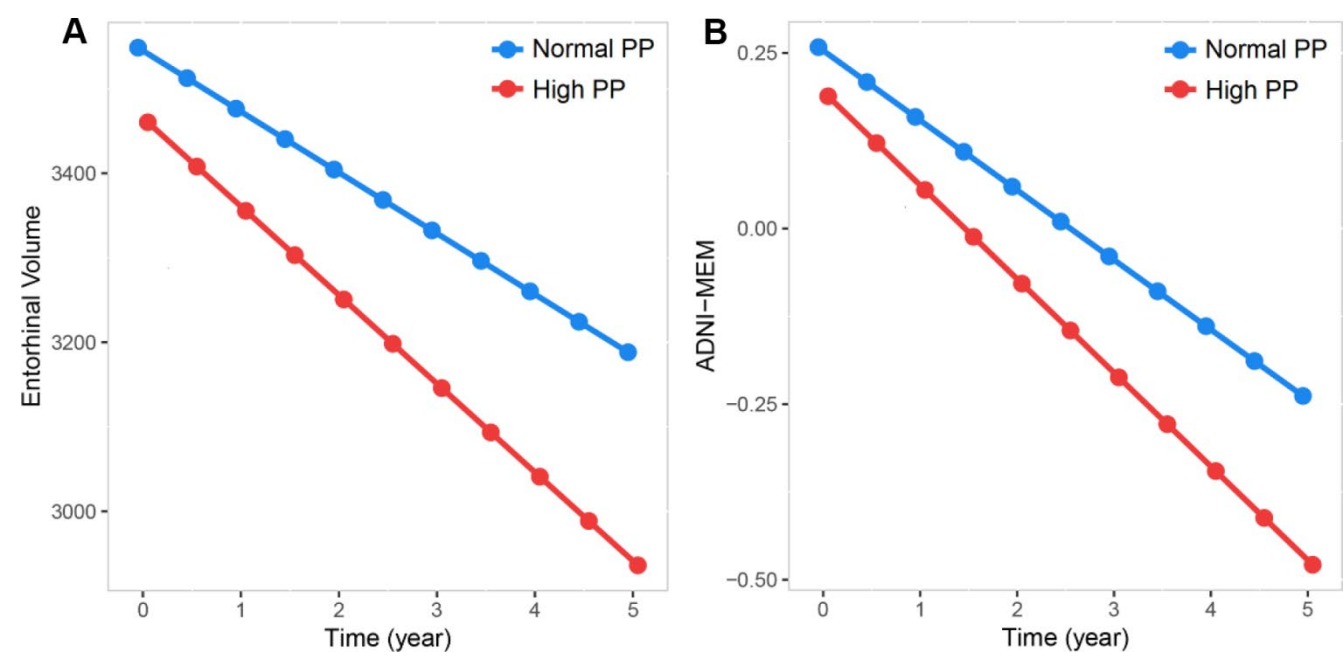

**Supplementary Figure 1. Associations between baseline pulse pressure and brain aging measurements in cognitive diagnosis subgroups.** Data from linear mixed-effects models adjusted for age, gender, education, *APOE*  $\epsilon$ 4 carrier status, vascular risk factors, cognitive diagnosis, as well as intracranial volume. (A, B) Increased PP level was associated with an accelerated decline in entorhinal volume and episodic memory within mild cognitive impairment group.
